# Supplementary material for: t4 report: Toward Good Read-Across Practice (GRAP) Guidance
Source: PubMed Central journal article supplement (PMC5581000; doi:10.14573/altex.1601251), 2016-02-11
Supplement: NIHMS834020-supplement-Supplementl_file.pdf [file NIHMS834020-supplement-Supplementl_file.pdf]

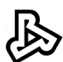

Ball et al.:

## t<sup>4</sup> report

# Toward Good Read-Across Practice (GRAP) Guidance

## Supplementary Data

| Decision number          | Substance name                                                                             | EC #      | CAS #       | Accepted | Substance ID | Lack of sufficient information | Inappropriate data | Scientific plausibility |
|--------------------------|--------------------------------------------------------------------------------------------|-----------|-------------|----------|--------------|--------------------------------|--------------------|-------------------------|
| CCH-D-2114290256-46-01/F | Ethylene carbonate                                                                         | 202-510-0 | 96-49-1     |          |              | x                              |                    | x                       |
| CCH-D-2114288615-38-01/F | Magnesium, bis(2-hydroxybenzoato-o1,o2)-, ar, ar'-di-c14-18alkyl derivs.                   | 931-371-5 | 171171-80-5 |          |              | x                              | x                  |                         |
| CCH-D-2114288112-54-01/F | Benzoic acid, 2-hydroxy-, mono-c14-18-alkyl derivs., calcium salts (2:1)                   | 931-276-9 | 114959-46-5 | x        |              |                                |                    |                         |
| CCH-D-2114288751-40-01/F | Dibutyl maleate                                                                            | 203-328-4 | 105-76-0    |          |              | x                              |                    |                         |
| CCH-D-2114289315-43-01/F | 2-Diethylaminoethanol                                                                      | 202-845-2 | 100-37-8    |          |              | x                              |                    |                         |
| CCH-D-2114288084-45-01/F | 4-Hydroxy-4-methylpentan-2-one                                                             | 204-626-7 | 123-42-2    |          |              |                                |                    | x                       |
| CCH-D-0000005614-74-01/F | Reaction mass of amides, rape-oil, N-(hydroxyethyl), ethoxylated and glycerol, ethoxylated | 932-164-2 |             |          |              | x                              |                    |                         |
| CCH-D-2114289309-36-01/F | Hexahydro-4-methylphthalic anhydride                                                       | 243-072-0 | 19438-60-9  |          |              | x                              |                    | x                       |
| CCH-D-0000004339-69-03/F | 2-Butene                                                                                   | 203-452-9 | 107-01-7    |          |              |                                |                    | x                       |
| CCH-D-2114288054-48-01/F | Butan-2-ol                                                                                 | 201-158-5 | 78-92-2     |          |              | x                              |                    | x                       |
| CCH-D-0000005483-73-04/F | Tert-butyl acetate                                                                         | 208-760-7 | 540-88-5    |          |              |                                |                    | x                       |
| CCH-D-0000004026-82-05/F | Phosphorodithioic acid, mixed O,O-bis(iso-bu and pentyl) esters, zinc salts                | 270-608-0 | 68457-79-4  | x*       |              |                                |                    |                         |
| CCH-D-0000004032-89-05/F | Zinc bis[O,O-bis(2-ethylhexyl)] bis(dithiophosphate)                                       | 224-235-5 | 4259-15-8   | x*       |              |                                |                    |                         |
| CCH-D-0000005192-80-02/F | Benzotriazole                                                                              | 202-394-1 | 95-14-7     |          |              | x                              |                    |                         |
| CCH-D-0000004930-75-04/F | Prop-2-yn-1-ol                                                                             | 203-471-2 | 107-19-7    |          |              |                                |                    | x                       |
| CCH-D-0000004884-64-04/F | Ethylenediamine, ethoxylated and propoxylated                                              | 500-047-1 | 26316-40-5  |          |              | x                              |                    |                         |

\* Decision withdrawn by ECHA; (x) Partial acceptance of read-across

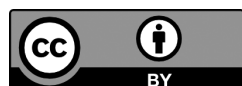

This is an Open Access article distributed under the terms of the Creative Commons Attribution 4.0 International license (<http://creativecommons.org/licenses/by/4.0/>), which permits unrestricted use, distribution and reproduction in any medium, provided the original work is appropriately cited.

<http://dx.doi.org/10.14573/altex.1601251s>

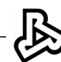

| Decision number          | Substance name                                                                                          | EC #      | CAS #      | Accepted | Substance ID | Lack of sufficient information | Inappropriate data | Scientific plausibility |
|--------------------------|---------------------------------------------------------------------------------------------------------|-----------|------------|----------|--------------|--------------------------------|--------------------|-------------------------|
| CCH-D-0000004262-82-05/F | Propylene carbonate                                                                                     | 203-572-1 | 108-32-7   |          |              | x                              |                    |                         |
| CCH-D-0000003802-77-04/F | Isophthaloyl dichloride                                                                                 | 202-774-7 | 99-63-8    |          |              | x                              |                    |                         |
| CCH-D-0000003782-71-03/F | Bismuth vanadium tetraoxide                                                                             | 237-898-0 | 14059-33-7 |          |              | x                              |                    |                         |
| CCH-D-0000002563-76-10/F | 2,4-Di-tert-butylphenol                                                                                 | 202-532-0 | 96-76-4    |          |              |                                |                    |                         |
| CCH-D-0000003713-76-05/F | 4-Hydroxy-2,2,6,6-tetramethylpiperidine-1-ethanol                                                       | 258-132-1 | 52722-86-8 |          |              | x                              | x                  |                         |
| CCH-D-0000002210-93-09/F | Geraniol                                                                                                | 203-377-1 | 106-24-1   |          |              | x                              | x                  |                         |
| CCH-D-0000003824-71-06/F | Alkenes, C7-9, hydroformylation products, distn. residues, heavy cracked fraction                       | 308-482-7 | 98072-31-2 |          |              |                                |                    | x                       |
| CCH-D-0000003878-58-03/F | 2-Propenoic acid, butyl ester, reaction products with butadiene, sulfur and tri-Ph phosphite            | 300-339-7 | 93925-37-2 |          |              | x                              |                    |                         |
| CCH-D-0000001733-76-10/F | Bis(nonylphenyl)amine                                                                                   | 253-249-4 | 36878-20-3 |          |              |                                | x                  |                         |
| CCH-D-0000002643-76-02/F | 67828-72-2_Master_strontium 4-[(4-chloro-5-methyl-2-sulphonatophenyl)azo]-3-hydroxy-2-naphthoate (1:1), | 267-291-6 | 67828-72-2 |          |              |                                |                    | x                       |
| CCH-D-0000003992-66-02/F | (3-Chloropropyl)triethoxysilane                                                                         | 225-805-6 | 5089-70-3  |          |              |                                | x                  |                         |
| CCH-D-0000002963-68-04/F | Zirconium praseodymium yellow zircon                                                                    | 269-075-7 | 68187-15-5 |          |              | x                              |                    |                         |
| CCH-D-0000003135-82-03/F | Hydrocarbons, C4, 1,3-butadiene- and isobutene-free                                                     | 306-004-1 | 95465-89-7 |          |              | x                              |                    |                         |
| CCH-D-0000003136-80-03/F | Hydrocarbons, C4, steam-cracker distillate                                                              | 295-405-4 | 92045-23-3 |          |              | x                              |                    |                         |
| CCH-D-0000003450-84-02/F | 2-methylbutane                                                                                          | 201-142-8 | 78-78-4    |          |              | x                              |                    |                         |
| CCH-D-0000003196-74-05/F | Dibutyltin oxide                                                                                        | 212-449-1 | 818-08-6   |          |              | x                              |                    |                         |
| CCH-D-0000003124-85-04/F | Fatty acids, hydrogenated tallow, distn. residues                                                       | 274-307-5 | 70084-85-4 |          |              | x                              |                    |                         |
| CCH-D-0000003129-75-04/F | Reaction mass of ethyl benzene and xylene                                                               | 905-588-0 |            |          |              | x                              |                    |                         |
| CCH-D-0000003128-77-04/F | Reaction mass of 2-methylbutyl acetate and pentyl acetate                                               | 908-918-1 |            |          |              | x                              |                    |                         |
| CCH-D-0000003111-92-04/F | Reaction mass of ethylbenzene and m-xylene and p-xylene                                                 | 905-562-9 |            |          |              | x                              |                    |                         |
| CCH-D-0000003117-80-04/F | Hydrocarbons, C5, n-alkanes, isoalkanes                                                                 | 921-577-3 |            |          |              | x                              |                    |                         |
| CCH-D-0000003116-82-04/F | Hydrocarbons, C6, n-alkanes, iso-alkanes, cyclics, n-hexane rich                                        | 925-292-5 |            |          |              | x                              |                    |                         |
| CCH-D-0000001978-58-08/F | 2-octyl-dodecan-1-ol                                                                                    | 226-242-9 | 5333-42-6  |          |              | x                              |                    |                         |

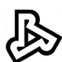

| Decision number          | Substance name                                                                                                                                                                                                        | EC #      | CAS #        | Accepted | Substance ID | Lack of sufficient information | Inappropriate data | Scientific plausibility |
|--------------------------|-----------------------------------------------------------------------------------------------------------------------------------------------------------------------------------------------------------------------|-----------|--------------|----------|--------------|--------------------------------|--------------------|-------------------------|
| CCH-D-0000002025-86-08/F | Sodium ethylenesulphonate                                                                                                                                                                                             | 221-242-5 | 3039-83-6    |          | x            |                                |                    |                         |
| CCH-D-0000002577-67-04/F | Cyclohexanone                                                                                                                                                                                                         | 203-631-1 | 108-94-1     |          |              | x                              |                    |                         |
| CCH-D-0000002614-77-03/F | Tall oil                                                                                                                                                                                                              | 232-304-6 | 8002-26-4    |          | x            | x                              |                    |                         |
| CCH-D-0000002118-79-10/F | Hydrogenated dimerization products of 1-decene, 1-dodecene and 1-octene                                                                                                                                               | 700-308-1 |              |          |              | x                              |                    | x                       |
| CCH-D-0000001990-72-06/F | 2-Dimethylaminoethyl methacrylate                                                                                                                                                                                     | 220-688-8 | 2867-47-2    |          |              | x                              |                    | x                       |
| CCH-D-0000002304-84-04/F | Vinyl 2-ethylhexanoate                                                                                                                                                                                                | 202-297-4 | 94-04-2      |          |              | x                              |                    | x                       |
| CCH-D-0000002254-81-04/F | Substance name and link to registration dossier not given as, due to exceptional circumstances specific to a registrant's situation, it has been established that such link would cause harm to commercial interests. |           |              |          | x            | x                              |                    |                         |
| CCH-D-0000002397-69-02/F | Dichloro(dimethyl)silane                                                                                                                                                                                              | 200-901-0 | 75-78-5      | (x)      |              |                                |                    | x                       |
| CCH-D-0000002289-68-04/F | 1,1,1,3,3,3-Hexamethyldisilazane                                                                                                                                                                                      | 213-668-5 | 999-97-3     |          |              |                                |                    | x                       |
| CCH-D-0000002301-90-03/F | Vinyl nononanoate                                                                                                                                                                                                     | 259-160-7 | 54423-67-5   |          |              |                                |                    | x                       |
| CCH-D-0000001699-60-07/F | Allyl alcohol                                                                                                                                                                                                         | 203-470-7 | 107-18-6     |          |              | x                              |                    | x                       |
| CCH-D-0000002181-86-02/F | 00000 RP002- Fe(III)HBED                                                                                                                                                                                              | 700-327-5 | 1061328-86-6 |          |              | x                              |                    |                         |
| CCH-D-0000001422-85-05/F | Camphene                                                                                                                                                                                                              | 201-234-8 | 79-92-5      |          |              | x                              |                    | x                       |
| CCH-D-0000001796-64-04/F | Ethanol, 2-methoxy-, manufacture of, by-products from, esters with boric acid                                                                                                                                         | 310-290-3 | 161907-80-8  |          | x            |                                |                    |                         |
| CCH-D-0000001777-64-03/F | Rosin, fumarated, reaction products with glycerol and pentaerythritol                                                                                                                                                 | 296-047-1 | 92202-14-7   |          | x            |                                |                    |                         |
| CCH-D-0000001776-66-03/F | Rosin, fumarated, reaction products with formaldehyde                                                                                                                                                                 | 305-795-0 | 95009-65-7   |          | x            |                                |                    |                         |
| CCH-D-0000001774-70-03/F | Reaction mass of resin acids and rosin acids, hydrogenated, sodium salts and sodium [1R-(1a,4aβ,10aa)]-1,2,3,4,4a,9,10,10a-octahydro-7-isopropyl-1,4a-dimethylphen-anthren-1-carboxylate                              | 915-568-3 |              |          | x            |                                |                    |                         |
| CCH-D-0000001773-72-03/F | Resin 835A                                                                                                                                                                                                            | 911-238-8 |              |          | x            |                                |                    |                         |
| CCH-D-0000001772-74-03/F | Resin acids and rosin acids, hydrogenated, esters with glycerol                                                                                                                                                       | 266-042-9 | 65997-13-9   |          | x            |                                |                    |                         |
| CCH-D-0000001771-76-03/F | Rosin, maleated                                                                                                                                                                                                       | 232-480-4 | 8050-28-0    |          | x            |                                |                    |                         |
| CCH-D-0000001770-78-03/F | Resin acids and rosin acids, hydrogenated, esters with pentaerythritol                                                                                                                                                | 264-848-5 | 64365-17-9   |          | x            |                                |                    |                         |

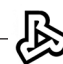

| Decision number          | Substance name                                                                                                                                                                                         | EC #      | CAS #       | Accepted | Substance ID | Lack of sufficient information | Inappropriate data | Scientific plausibility |
|--------------------------|--------------------------------------------------------------------------------------------------------------------------------------------------------------------------------------------------------|-----------|-------------|----------|--------------|--------------------------------|--------------------|-------------------------|
| CCH-D-0000001765-69-03/F | Rosin, hydrogenated                                                                                                                                                                                    | 266-041-3 | 65997-06-0  |          | x            |                                |                    |                         |
| CCH-D-0000001764-71-03/F | Reaction mass of resin acids and rosin acids, hydrogenated, potassium salts and potassium [1R-(1a,4a $\beta$ ,10aa)]-1,2,3,4,4a,10,10a, octahydro-7-isopropyl-1, 4a dimethylphenanthrene-1-carboxylate | 915-657-7 |             |          | x            |                                |                    |                         |
| CCH-D-0000001759-62-03/F | R-F-P 94581-15-4, resin acids and Rosin acids, fumarated, esters with pentaerythritol                                                                                                                  | 305-514-1 | 94581-15-4  |          | x            |                                |                    |                         |
| CCH-D-0000001775-68-03/F | Fatty acids, tall-oil, oligomeric reaction products with maleic anhydride and rosin, calcium magnesium zinc salts                                                                                      | 500-451-8 | 160901-14-4 |          | x            |                                |                    |                         |
| CCH-D-0000001769-61-03/F | Resin acids and rosin acids, esters with glycerol                                                                                                                                                      | 232-482-5 | 8050-31-5   |          | x            |                                |                    |                         |
| CCH-D-0000001767-65-03/F | Resin acids and rosin acids, esters with triethylene glycol                                                                                                                                            | 232-478-3 | 8050-25-7   |          | x            |                                |                    |                         |
| CCH-D-0000001763-73-03/F | Resin acids and rosin acids, calcium zinc salts                                                                                                                                                        | 269-825-3 | 68334-35-0  |          | x            |                                |                    |                         |
| CCH-D-0000001762-75-03/F | Resin acids and rosin acids, sodium salts                                                                                                                                                              | 263-144-5 | 61790-51-0  |          | x            |                                |                    |                         |
| CCH-D-0000001761-77-03/F | Rosin, reaction products with formaldehyde                                                                                                                                                             | 293-659-0 | 91081-53-7  |          | x            |                                |                    |                         |
| CCH-D-0000001758-64-03/F | Resin acids and rosin acids, potassium salts                                                                                                                                                           | 263-142-4 | 61790-50-9  |          | x            |                                |                    |                         |
| CCH-D-0000001757-66-03/F | Magnesium (1R,4aR,4bR,10aR)-1, 4a-dimethyl-7-propan-2-yl-2,3,4,4b,5,6,10,10a-octahydrophenanthrene-1-carboxylate                                                                                       | 270-461-2 | 68440-56-2  |          | x            |                                |                    |                         |
| CCH-D-0000001756-68-03/F | Calcium (1R,4aR,4bR,10aR)-1,4a-dimethyl-7-propan-2-yl-2,3,4,4b,5,6,10,10a-octahydrophenanthrene-1-carboxylate                                                                                          | 232-694-8 | 9007-13-0   |          | x            |                                |                    |                         |
| CCH-D-0000001716-72-04/F | Dipropylene glycol methyl ether acetate                                                                                                                                                                | 406-880-6 | 88917-22-0  |          |              | x                              |                    | x                       |
| CCH-D-0000001941-75-02/F | Disodium metasilicate                                                                                                                                                                                  | 229-912-9 | 6834-92-0   |          |              | x                              |                    |                         |
| CCH-D-0000001702-81-02/F | Decane                                                                                                                                                                                                 | 204-686-4 | 124-18-5    |          | x            |                                |                    |                         |
| CCH-D-0000001655-72-03/F | Dodecane                                                                                                                                                                                               | 203-967-9 | 112-40-3    |          | x            |                                |                    |                         |
| CCH-D-0000001649-65-03/F | Undecane                                                                                                                                                                                               | 214-300-6 | 1120-21-4   |          | x            |                                |                    |                         |



| Decision number          | Substance name                                                                                                                                                                                                        | EC #      | CAS #      | Accepted | Substance ID | Lack of sufficient information | Inappropriate data | Scientific plausibility |
|--------------------------|-----------------------------------------------------------------------------------------------------------------------------------------------------------------------------------------------------------------------|-----------|------------|----------|--------------|--------------------------------|--------------------|-------------------------|
| CCH-D-0000001643-77-03/F | Hydrocarbons, C13-C18, n-alkanes, isoalkanes, cyclics, <2% aromatics                                                                                                                                                  | 928-253-0 |            |          | x            |                                |                    |                         |
| CCH-D-0000001641-81-03/F | Hydrocarbons, C10-C14, n-alkanes, isoalkanes, <2% aromatics                                                                                                                                                           | 920-274-3 |            |          | x            |                                |                    |                         |
| CCH-D-0000001639-66-03/F | Hydrocarbons, C10-C13, n-alkanes, <2% aromatics                                                                                                                                                                       | 929-018-5 |            |          | x            |                                |                    |                         |
| CCH-D-0000001638-68-03/F | Isododecane                                                                                                                                                                                                           | 297-629-8 | 93685-81-5 |          | x            |                                |                    |                         |
| CCH-D-0000001633-78-03/F | Tetradecane                                                                                                                                                                                                           | 211-096-0 | 629-59-4   |          | x            |                                |                    |                         |
| CCH-D-0000001631-82-03/F | Hydrocarbons, C14-C20, n-alkanes, aromatics (<2%)                                                                                                                                                                     | 923-583-1 |            |          | x            |                                |                    |                         |
| CCH-D-0000001629-67-03/F | Hydrocarbons, C16-C20, n-alkanes, isoalkanes, cyclics, aromatics (<2%)                                                                                                                                                | 919-029-3 |            |          | x            |                                |                    |                         |
| CCH-D-0000001628-69-03/F | Hydrocarbons, C13-C15, n-alkanes, isoalkanes, cyclics, <2% aromatics                                                                                                                                                  | 917-488-4 |            |          | x            |                                |                    |                         |
| CCH-D-0000001624-77-03/F | Isohexadecane                                                                                                                                                                                                         | 297-628-2 | 93685-80-4 |          | x            |                                |                    |                         |
| CCH-D-0000001623-79-03/F | Hydrocarbons, C14-C20, n-alkanes, isoalkanes, <2% aromatics                                                                                                                                                           | 931-265-9 |            |          | x            |                                |                    |                         |
| CCH-D-0000001618-70-03/F | Hydrocarbons, C14-C18, n-alkanes, isoalkanes, cyclics, <2% aromatics                                                                                                                                                  | 927-632-8 |            |          | x            |                                |                    |                         |
| CCH-D-0000001640-83-03/F | Substance name and link to registration dossier not given as, due to exceptional circumstances specific to a registrant's situation, it has been established that such link would cause harm to commercial interests. |           |            |          | x            |                                |                    |                         |
| CCH-D-0000001635-74-03/F | Hydrocarbons, C10-C13, n-alkanes, isoalkanes, cyclics, < 2% aromatics                                                                                                                                                 | 918-481-9 |            |          | x            |                                |                    |                         |
| CCH-D-0000001626-73-03/F | 920-134-1                                                                                                                                                                                                             | 920-134-1 |            |          | x            |                                |                    |                         |
| CCH-D-0000001650-82-03/F | Hydrocarbons, C11-C14, n-alkanes, <2% aromatics                                                                                                                                                                       | 924-803-9 |            |          | x            |                                |                    |                         |
| CCH-D-0000001644-75-03/F | Tridecane                                                                                                                                                                                                             | 211-093-4 | 629-50-5   |          | x            |                                |                    |                         |
| CCH-D-0000001637-70-03/F | Hydrocarbons, C10-C13, n-alkanes, isoalkanes, cyclics, aromatics (2-25%)                                                                                                                                              | 919-164-8 |            |          |              |                                |                    |                         |
| CCH-D-0000001627-71-03/F | Hydrocarbons, C14-C18, n-alkanes, isoalkanes, cyclics, aromatics (2-30%)                                                                                                                                              | 920-360-0 |            |          | x            |                                |                    |                         |
| CCH-D-0000001625-75-03/F | Hydrocarbons, C14-C19, isoalkanes, cyclics, <2% aromatics                                                                                                                                                             | 920-114-2 |            |          | x            |                                |                    |                         |



| Decision number          | Substance name                                                                                                                                                                                                        | EC #      | CAS #              | Accepted | Substance ID | Lack of sufficient information | Inappropriate data | Scientific plausibility |
|--------------------------|-----------------------------------------------------------------------------------------------------------------------------------------------------------------------------------------------------------------------|-----------|--------------------|----------|--------------|--------------------------------|--------------------|-------------------------|
| CCH-D-0000001622-81-03/F | Hydrocarbons, C11-C14, isoalkanes, cyclics, <2% aromatics                                                                                                                                                             | 927-285-2 |                    |          | x            |                                |                    |                         |
| CCH-D-0000001617-72-03/F | Hydrocarbons, C14-C17, n-alkanes, <2% aromatics                                                                                                                                                                       | 917-828-1 |                    |          | x            |                                |                    |                         |
| CCH-D-0000001604-79-03/F | Hydrocarbons, C9-C12, n-alkanes, isoalkanes, cyclics, aromatics (2-25%)                                                                                                                                               | 919-446-0 |                    |          | x            |                                |                    |                         |
| CCH-D-0000001329-73-04/F | Substance name and link to registration dossier not given as, due to exceptional circumstances specific to a registrant's situation, it has been established that such link would cause harm to commercial interests. |           |                    |          |              | x                              |                    |                         |
| CCH-D-0000001260-89-04/F | S190700                                                                                                                                                                                                               | 443-510-2 |                    |          |              | x                              |                    |                         |
| CCH-D-0000001212-90-05/F | Vegeflux soy                                                                                                                                                                                                          | 483-980-6 |                    |          |              | x                              |                    |                         |
| CCH-D-0000001202-91-03/F | Substance name not yet available, as the public name to be used in the registered substances webpage is being determined.                                                                                             |           |                    | (x)      |              |                                |                    |                         |
| CCH-D-2114289967-22-01/F | Buta-1,2-diene                                                                                                                                                                                                        | 209-674-2 | 590-19-2           |          |              |                                |                    | x                       |
| CCH-D-2114289108-42-01/F | Dimethylamine                                                                                                                                                                                                         | 204-697-4 | 124-40-3           |          |              | x                              |                    |                         |
| CCH-D-2114292038-46-01/F | Dibutyl fumarate                                                                                                                                                                                                      | 203-327-9 | 105-75-9           |          |              | x                              |                    | x                       |
|                          |                                                                                                                                                                                                                       |           | <b>Total Count</b> | <b>5</b> | <b>48</b>    | <b>43</b>                      |                    | <b>20</b>               |

\* Decision withdrawn by ECHA; (x) Partial acceptance of read-across
